# Supplementary material
Source: Springer Nature journal article supplement (https://www.springermedizin.de/resource/supplementary/12911_2009_304_MOESM17_ESM.pdf/9525492)

# Breakdown of loading times of the sedation protocol

- Loading statefull session
- Loading remainder of Production memory
- Loading Rule Flows
- Remainder

- Loading a new thread
- Loading Working memory
- Loading Work Items
- Loading Logger

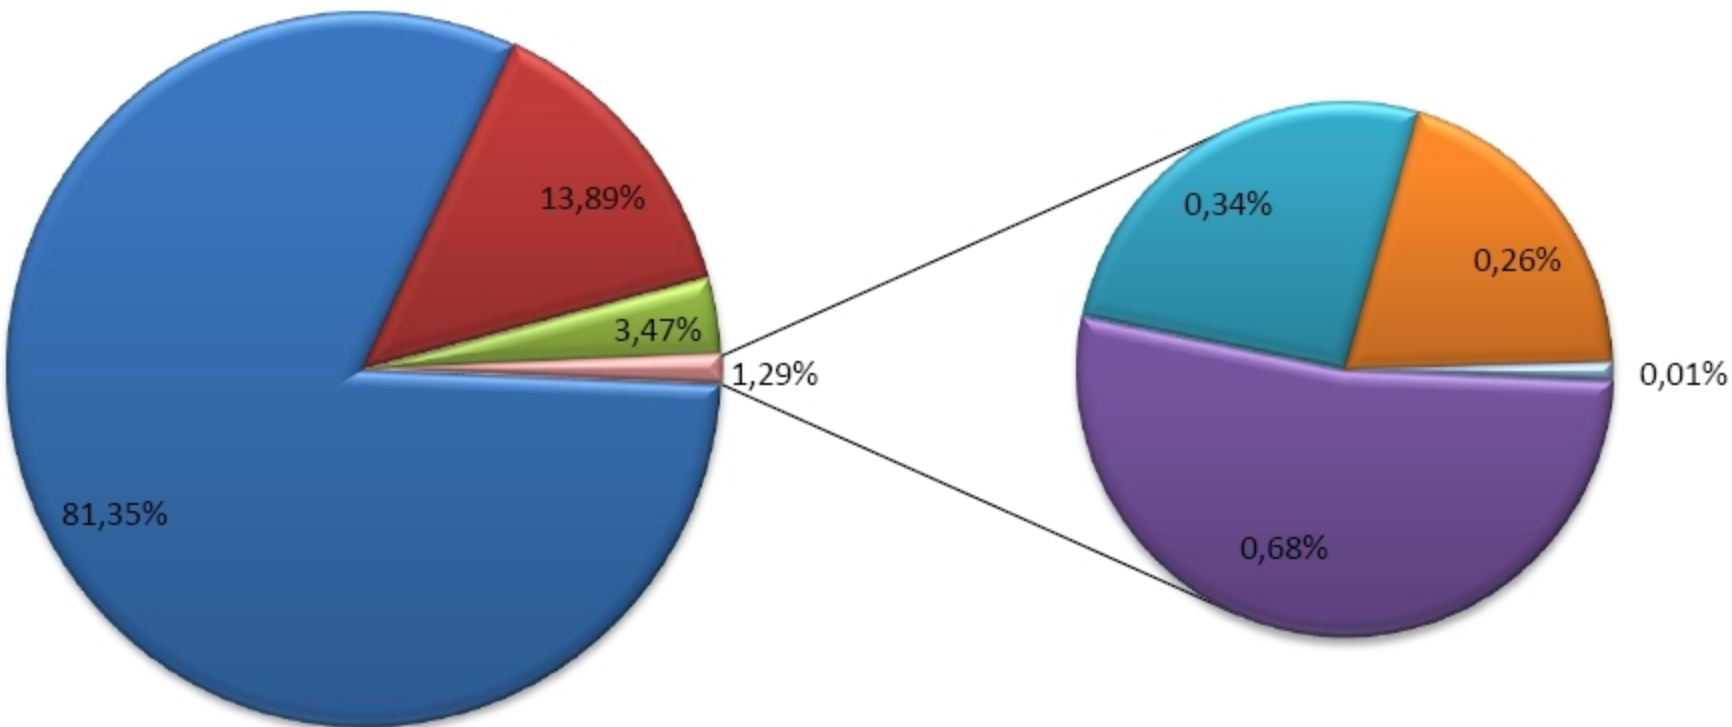

Supplement: MOESM17 [file 9525492]
